# Supplementary material
Source: Research Square preprint supplement (doi:10.21203/rs.3.rs-8667960/v1)
Supplement: Supplementary file 1 [file 1f57b2646fd3fa4af22a648c.xlsx]

## Sheet: Table-1
Table 1. Percentage distribution of mothers' anaemia status by Children anaemia status, NFHS-II to IV, India.
	Type of NFHS round	Anaemia status	Children anaemia
			Severe	Moderate	Mild	Not anaemic
Women anaemia	NFHS III	Severe	10.5	49.7	21.6	18.2
		Moderate	5.6	50	23	21.4
		Mild	2.7	42.9	27.3	27.1
		Not anaemic	1.6	33.1	26.8	38.5
			Severe	Moderate	Mild	Not anaemic
	NFHS IV	Severe	8.4	44.8	22.3	24.5
		Moderate	3.2	41.4	27.3	28.1
		Mild	1.6	31.5	29.2	37.7
		Not anaemic	1	21.7	25.4	51.8
			Severe	Moderate	Mild	Not anaemic
	NFHS V	Severe	6.06	48.69	23.63	21.62
		Moderate	2.75	43.58	29.05	24.62
		Mild	1.97	36.78	30.56	30.69
		Not anaemic	1.54	30.45	28.74	39.27

## Sheet: Table-2
	Table 2. Indicates the prevalence of anaemia in children in India, NFHS-III and V, by backgrounds and mothers.
		Background characteristics	Categories	NFHS-IV	Total	NFHS-V	Total
		Age in 5-year groups	15–19	65	3988	63.4	3314
			20–24	61.5	60175	60.96	51057
			25–29	57.8	82188	58.39	76070
			30–34	56.1	41184	57.02	38013
			35–39	55.2	16035	57.22	14745
			40–44	58.8	4608	57.51	3457
			45–49	57.9	1317	53.47	909
		Highest educational level	No education	65	65916	63.61	40324
			Primary	60.6	30664	60.85	24053
			Secondary	55.8	93929	58.15	97591
			Higher	49.6	18986	51.53	25597
		Type of place of residence	Urban	56.1	49826	53.77	38124
			Rural	59.6	159669	60.04	149441
		Wealth index	Poorest	64.1	55133	64.44	49868
			Poorer	59.9	49361	59.89	43961
			Middle	59.1	41853	57.43	36845
			Richer	54.5	35001	54.97	31856
			Richest	51.9	28147	52.29	25035
		Currently breastfeeding	No	53.2	77443	56.33	70047
			Yes	62.1	132052	60.22	117518
		Sex of child	Male	58.5	109087	58.57	97088
			Female	58.8	100408	58.98	90477
		Size of child at birth	Very large	58.1	10433	57.67	12583
			Larger than average	57.3	24933	58.81	21818
			Average	58.4	145286	58.61	134778
			Smaller than average	61	18434	60.21	14430
			Very small	63.5	5787	62.01	3956
		Age of child (in months)	>=12	68.7	25930	59.23	24285
			13–23	70.7	42791	59.76	37166
			24–35	62.4	46375	58.93	41379
			36–47	52.3	48305	58.41	41592
			48–59	44.7	46094	57.84	43143
		Women anaemic	No	50.6	92507	48.92	58732
			Yes	64.8	116311	63.61	119967
		Religion	Hindu	58.8	152041	60.63	138375
			Muslim	59.2	32621	56.85	26383
			Others	53.5	24833	49.67	22807
		Birth order	1	55.6	76761	57.62	71895
			2	58.4	64886	58.74	62469
			3	61.8	33896	60.09	29216
			4 & above	64	33952	60.66	23985
		Caste	Scheduled caste	60.8	39787	61.72	38365
			Scheduled tribe	63.8	41454	59.15	38185
			Other Backward Class	58.7	82837	57.6	72074
			Other	54.7	36346	57.07	29998

## Sheet: Table-3
		Table 3. Indicates the adjusted odds ratio for the covariates' association with anaemia in children in India who are enrolled in NFHS-IV and V.
			Background characteristics	Categories	NFHS-IV	Total	NFHS-V	Total
			Age in 5-year groups	15–19	65	3988	63.4	3314
				20–24	61.5	60175	60.96	51057
				25–29	57.8	82188	58.39	76070
				30–34	56.1	41184	57.02	38013
				35–39	55.2	16035	57.22	14745
				40–44	58.8	4608	57.51	3457
				45–49	57.9	1317	53.47	909
			Highest educational level	No education	65	65916	63.61	40324
				Primary	60.6	30664	60.85	24053
				Secondary	55.8	93929	58.15	97591
				Higher	49.6	18986	51.53	25597
			Type of place of residence	Urban	56.1	49826	53.77	38124
				Rural	59.6	159669	60.04	149441
			Wealth index	Poorest	64.1	55133	64.44	49868
				Poorer	59.9	49361	59.89	43961
				Middle	59.1	41853	57.43	36845
				Richer	54.5	35001	54.97	31856
				Richest	51.9	28147	52.29	25035
			Currently breastfeeding	No	53.2	77443	56.33	70047
				Yes	62.1	132052	60.22	117518
			Sex of child	Male	58.5	109087	58.57	97088
				Female	58.8	100408	58.98	90477
			Size of child at birth	Very large	58.1	10433	57.67	12583
				Larger than average	57.3	24933	58.81	21818
				Average	58.4	145286	58.61	134778
				Smaller than average	61	18434	60.21	14430
				Very small	63.5	5787	62.01	3956
			Age of child (in months)	>=12	68.7	25930	59.23	24285
				13–23	70.7	42791	59.76	37166
				24–35	62.4	46375	58.93	41379
				36–47	52.3	48305	58.41	41592
				48–59	44.7	46094	57.84	43143
			Women anaemic	No	50.6	92507	48.92	58732
				Yes	64.8	116311	63.61	119967
			Religion	Hindu	58.8	152041	60.63	138375
				Muslim	59.2	32621	56.85	26383
				Others	53.5	24833	49.67	22807
			Birth order	1	55.6	76761	57.62	71895
				2	58.4	64886	58.74	62469
				3	61.8	33896	60.09	29216
				4 & above	64	33952	60.66	23985
			Caste	Scheduled caste	60.8	39787	61.72	38365
				Scheduled tribe	63.8	41454	59.15	38185
				Other Backward Class	58.7	82837	57.6	72074
				Other	54.7	36346	57.07	29998

## Sheet: Table-4
Table 4. Indicates the percentage distribution of mothers' BMI status by the nutritional status of their children in India.
	Table 4. Indicates the percentage distribution of mothers' BMI status by the nutritional status of their children in India.
		Type of NFHS round	Anaemia status	Children anaemia
				Severe	Moderate	Mild	Not anaemic
	Women anaemia	NFHS III	Severe	10.5	49.7	21.6	18.2
			Moderate	5.6	50	23	21.4
			Mild	2.7	42.9	27.3	27.1
			Not anaemic	1.6	33.1	26.8	38.5
				Severe	Moderate	Mild	Not anaemic
		NFHS IV	Severe	8.4	44.8	22.3	24.5
			Moderate	3.2	41.4	27.3	28.1
			Mild	1.6	31.5	29.2	37.7
			Not anaemic	1	21.7	25.4	51.8
				Severe	Moderate	Mild	Not anaemic
		NFHS V	Severe	6.06	48.69	23.63	21.62
			Moderate	2.75	43.58	29.05	24.62
			Mild	1.97	36.78	30.56	30.69
			Not anaemic	1.54	30.45	28.74	39.27

## Sheet: Table-5
	Table 5. Stunting, underweight and wasted prevalence by mother and child background characteristics among children in India, NFHS-III and IV
				NFHS-IV					NFHS-V
	Background characteristics	Categories	Stunting	Total	Underweight	Total	Wasting	Total	Stunting	Total	Underweight	Total	Wasting	Total
	Age in 5-year groups	15–19	33	5452	33.7	5451	23.6	5452	37.16	3167	33.82	3270	21.05	3135
		20–24	37.8	67366	35.8	67362	22.6	67366	38.16	49429	32	50375	18.33	48764
		25–29	38.3	86852	35.6	86844	20.6	86852	36.09	73941	31.24	75033	17.86	72709
		30–34	39.2	42825	36.1	42824	20	42825	34.99	37218	29.88	37753	17.17	36537
		35–39	42.8	16555	38.9	16555	21.1	16555	35.97	14456	30.2	14638	17.38	14142
		40–44	48.4	4636	44.9	4636	20.6	4636	38.07	3407	30.46	3457	16.8	3345
		45–49	53.2	1316	45.6	1316	20.9	1316	39.24	897	35.82	913	20.27	883
	Highest educational level	No education	51.1	68978	47.2	68976	23	68978	46.24	39180	40.97	39816	20.58	38542
		Primary	43.8	32835	40.4	32834	21.5	32835	43.05	23443	36.05	23811	18.73	23094
		Secondary	33.1	102191	31.4	102182	20.7	102191	34.17	94940	29	96491	17.43	93371
		Higher	21.1	20998	19.2	20996	18.2	20998	23.81	24952	19.21	25321	14.39	24508
	Type of place of residence	Urban	31.3	53483	29.6	53479	20.2	53483	30.24	37142	25.67	37719	16.74	36439
		Rural	41.5	171159	38.6	171509	21.7	171519	38.08	145373	32.54	147720	18.14	143076
	Wealth index	Poorest	51.8	58330	49	58328	24.4	58330	46.76	48477	41.47	49318	21.13	47791
		Poorer	43.8	53162	40.8	53158	22	53162	39.92	42766	33.5	43466	18.32	42100
		Middle	36.8	45136	33.7	45133	20.3	45136	34.73	35826	29.05	36382	17.2	35210
		Richer	29.5	37815	27.7	37813	19.5	37815	28.48	31013	24.28	31492	15.97	30451
		Richest	22.5	30559	20.4	30556	18.1	30559	22.81	24433	18.22	24781	13.88	23963
	Currently breastfeeding	No	36.6	76659	33.4	76650	18.4	76659	33.98	68567	28.78	69192	16.11	67108
		Yes	39.8	148343	37.6	148338	22.8	148343	37.99	113948	32.54	116247	18.9	112407
	Sex of child	Male	39.2	116360	36.5	116351	22.1	116360	37.46	94375	32.12	95957	18.64	92589
		Female	38.1	108642	35.7	108637	20.3	108642	35.44	88140	30.09	89482	17.02	86926
	Size of child at birth	Very large	35	11022	31.6	11020	19.5	11022	35.99	12189	30.77	12419	17.72	11991
		Larger than average	34.4	27049	31.9	27047	20.1	27049	34.89	21240	28.92	21571	17.04	20872
		Average	38.1	155838	35.2	155828	20.8	155838	35.97	131194	30.46	133276	17.57	129036
		Smaller than average	45.3	20046	44.9	20046	24.7	20046	41.78	14079	37.73	14288	20.34	13879
		Very small	53.2	6178	54	6178	28.3	6178	45.24	3813	43.86	3885	23.33	3737
	Age of child (in months)	>=12 months	22.5	45686	28.4	45682	29.5	45686	25.68	23147	25.35	24001	21.73	22948
		13–23	44.3	41492	35.8	41488	21.7	41492	40.64	35882	30.66	36917	19.15	35659
		24–35	43	45096	38	45093	19.2	45096	37.64	40544	32.34	41065	18.38	39731
		36–47	43.6	47410	38.7	47408	18	47410	38.99	40888	32.36	41191	15.92	40062
		48–59	40.3	45318	39.4	45317	17.9	45318	35.33	42054	32.49	42265	15.96	41115
	Religion	Hindu	38.8	163089	36.7	163078	21.7	163089	36.78	134200	32.34	136364	18.19	132131
		Muslim	40.1	35241	35.3	35240	19.5	35241	36.79	25883	32.22	26345	19.77	25270
		Others	32	26672	29.8	26670	20	26672	34.35	22432	22.68	22730	13.69	22114
	Birth Order	1	33.5	83046	31.9	83040	20.7	83046	32.27	69757	27.39	70926	16.87	68642
		2	37.4	69784	34.9	69779	21	69784	35.78	60856	30.71	61792	18.06	59784
		3	43.1	36228	39.7	36226	21.8	36228	40.45	28463	35.24	28905	18.87	27988
		4 & above	50.7	35944	46.3	35943	22.6	35944	46.05	23439	38.45	23816	19.03	23101
	Body Mass Index	Underweight	38.5	138772	34.7	138761	20.6	138772	44.57	34211	43.22	34784	23.02	33779
		Normal	46.2	50809	48.5	50808	27.2	50809	36.59	114063	30.79	115900	17.95	112017
		Overweight	27.4	31530	22.1	31527	14.3	31530	28.35	25975	20.67	26357	12.68	25581
		Obese	43.1	42540	39.6	42538	21.5	42540	25.23	7202	16.41	7305	10.19	7108
	Caste	Scheduled Caste	44.2	44440	45.4	44437	27.3	44440	40.35	37334	34.53	37941	18.12	36854
		Scheduled Tribe	39	88803	36	88798	20.8	88803	39.58	37180	32.14	37760	18.57	36456
		Other Backward Class	31	39399	28.9	39395	19.3	39399	36.43	70072	32.01	71167	18.22	68935
		Others	38.7	215511	36	215502	21.2	215511	28.53	29192	23.81	29661	15.25	28717

## Sheet: Table-6
	Table 7. Adjusted odds ratios showing the association between various covariates and the likelihood of stunting, underweight, and wasting among children in India, based on NFHS-IV data.
	Background characteristics	Categories	Stunting		Underweight		Wasting
			P-value	Odds ratio (95% C.I.)	P-value	Odds ratio (95% C.I.)	P-value	Odds ratio (95% C.I.)
	Age in 5-year groups	15–19@
		20–24	0.306	0(0 - 0)	0.66	0.99 (0.92–1.05)	0.001	1.12 (1.05–1.2)
		25–29	0.000	0(0 - 0)	0.01	0.92 (0.86–0.98)	0.003	1.12 (1.04–1.2)
		30–34	0.000	0(0 - 0)	0.000	0.84 (0.78–0.9)	0.021	1.1 (1.01–1.18)
		35–39	0.000	0(0 - 0)	0.000	0.8 (0.74–0.86)	0.071	1.08 (0.99–1.18)
		40–44	0.000	0(0 - 0)	0.02	0.89 (0.81–0.98)	0.06	1.11 (1–1.24)
		45–49	0.000	0(0 - 0)	0.000	0.72 (0.62–0.83)	0.186	1.12 (0.95–1.32)
	Highest educational level	No education@
		Primary	0.000	0(0 - 0)	0.000	0.89 (0.86–0.91)	0.000	0.93 (0.9–0.96)
		Secondary	0.000	0(0 - 0)	0.000	0.76 (0.74–0.77)	0.000	0.92 (0.89–0.94)
		Higher	0.000	0(0 - 0)	0.000	0.59 (0.56–0.62)	0.000	0.88 (0.83–0.92)
	Type of place of residence	Urban@	0.000	0(0 - 0)	0.000		0.000
		Rural	0.000	0(0 - 0)	0.000	0.87 (0.85–0.89)	0.000	0.91 (0.89–0.94)
	Wealth index	Poorest@		0(0 - 0)
		Poorer	0.000	0(0 - 0)	0.000	0.79 (0.77–0.81)	0.000	0.87 (0.84–0.9)
		Middle	0.000	0(0 - 0)	0.000	0.66 (0.64–0.68)	0.000	0.83 (0.8–0.86)
		Richer	0.000	0(0 - 0)	0.000	0.57 (0.55–0.59)	0.000	0.82 (0.79–0.85)
		Richest	0.000	0(0 - 0)	0.000	0.48 (0.46–0.5)	0.000	0.8 (0.76–0.84)
	Currently breastfeeding	No@		0(0 - 0)
		Yes	0.000	0(0 - 0)	0.000	1.17 (1.15–1.2)	0.601	0.99 (0.97–1.02)
	Sex of child	Male@		0(0 - 0)
		Female	0.000	0(0 - 0)	0.000	0.93 (0.91–0.95)	0.000	0.88 (0.86–0.9)
	Size of child at birth	Very large@		0(0 - 0)
		Larger than average	0.113	0(0 - 0)	0.88	1 (0.95–1.05)	0.571	0.98 (0.93–1.04)
		Average	0.004	0(0 - 0)	0.000	1.09 (1.04–1.14)	0.586	1.01 (0.96–1.07)
		Smaller than average	0.000	0(0 - 0)	0.000	1.54 (1.46–1.62)	0.000	1.19 (1.12–1.26)
		Very small	0.000	0(0 - 0)	0.000	2.05 (1.91–2.2)	0.000	1.46 (1.36–1.58)
	Age of child (in months)	>=12@	0.000	0(0 - 0)	0.000		0.000
		13–23	0.000	0(0 - 0)	0.000	1.44 (1.39–1.48)	0.000	0.68 (0.65–0.7)
		24–35	0.000	0(0 - 0)	0.000	1.72 (1.67–1.78)	0.000	0.63 (0.61–0.66)
		36–47	0.000	0(0 - 0)	0.000	1.8 (1.74–1.86)	0.000	0.57 (0.55–0.59)
		48–59	0.000	0(0 - 0)	0.000	1.85 (1.79–1.92)	0.000	0.55 (0.53–0.58)
	Religion	Hindu@		0(0 - 0)
		Muslim	0.000	0(0 - 0)	0.3	0.98 (0.96–1.01)	0.000	0.89 (0.86–0.92)
		Others	0.000	0(0 - 0)	0.000	0.57 (0.55–0.59)	0.000	0.63 (0.61–0.66)
	Birth order	1@	0.000	0(0 - 0)	0.000
		2	0.000	0(0 - 0)	0.000	1.13 (1.11–1.16)	0.067	1.03 (1–1.05)
		3	0.000	0(0 - 0)	0.000	1.23 (1.19–1.26)	0.073	1.03 (1–1.07)
		4 & above	0.000	0(0 - 0)	0.000	1.35 (1.3–1.4)	0.612	1.01 (0.97–1.05)
	Body Mass Index	Underweight		0(0 - 0)
		Normal	0.000	0(0 - 0)	0.000	0.26 (1.6–1.67)	0.000	0.60 (1.37–1.43)
		Overweight/Obese	0.000	0(0 - 0)	0.000	0.68 (0.65–0.7)	0.000	0.68 (0.66–0.71)
	Caste	Scheduled caste@		0(0 - 0)
		Scheduled tribe	0.000	0(0 - 0)	0.000	0.94 (0.91–0.97)	0.000	1.15 (1.11–1.19)
		Other Backward Class	0.000	0(0 - 0)	0.000	0.94 (0.92–0.97)	0.000	0.98 (0.95–1.01)
		None of above	0.000	0(0 - 0)	0.000	0.77 (0.74–0.8)	0.000	0.91 (0.88–0.95)
	Note: @ Reference category. C.I.-Confidence Interval.

## Sheet: Table-7
	Table 7. Adjusted odds ratios showing the association between various covariates and the likelihood of stunting, underweight, and wasting among children in India, based on NFHS-5 data.
	Background characteristics	Categories	Stunting		Underweight		Wasting
			P-value	Odds ratio (95% C.I.)	P-value	Odds ratio (95% C.I.)	P-value	Odds ratio (95% C.I.)
	Age in 5-year groups	15–19@
		20–24	0.604	0.94(0.82 - 1.07)	0.885	0.99(0.9 -1.09)	0.002	0.88(0.81 - 0.96)
		25–29	0.000	0.84(0.73 - 0.97)	0.219	1.06(0.96 -1.17)	0.000	0.84(0.77 - 0.91)
		30–34	0.000	0.79(0.68 - 0.91)	0.089	1.09(0.99 -1.21)	0.000	0.78(0.72 - 0.85)
		35–39	0.000	0.79(0.68 - 0.92)	0.034	1.13(1.01 -1.26)	0.000	0.74(0.68 - 0.82)
		40–44	0.000	0.84(0.7 - 1.01)	0.251	1.09(0.94 -1.25)	0.000	0.69(0.62 - 0.78)
		45–49	0.000	0.64(0.5 - 0.82)	0.003	1.35(1.11 -1.65)	0.005	0.79(0.66 - 0.93)
	Highest educational level	No education@
		Primary	0.006	1.03(0.97 - 1.1)	0.008	0.94(0.9 -0.98)	0.000	0.9(0.87 - 0.94)
		Secondary	0.000	0.86(0.82 - 0.91)	0.000	0.93(0.9 -0.96)	0.000	0.8(0.78 - 0.83)
		Higher	0.000	0.77(0.69 - 0.85)	0.000	0.84(0.79 -0.88)	0.000	0.66(0.63 - 0.69)
	Type of place of residence	Urban@
		Rural	0.000	0.93(0.86 - 1)	0.000	0.89(0.86 -0.92)	0.000	0.9(0.87 - 0.93)
	Wealth index	Poorest@
		Poorer	0.000	0.87(0.83 - 0.92)	0.000	0.89(0.86 -0.93)	0.000	0.8(0.78 - 0.83)
		Middle	0.000	0.76(0.71 - 0.81)	0.000	0.86(0.82 -0.89)	0.000	0.72(0.69 - 0.74)
		Richer	0.000	0.62(0.57 - 0.68)	0.000	0.82(0.78 -0.85)	0.000	0.62(0.59 - 0.64)
		Richest	0.000	0.45(0.39 - 0.53)	0.000	0.74(0.7 -0.78)	0.000	0.5(0.48 - 0.52)
	Currently breastfeeding	No@
		Yes	0.000	1.08(1.03 - 1.14)	0.163	1.02(0.99 -1.05)	0.000	1.14(1.11 - 1.17)
	Sex of child	Male@
		Female	0.000	0.84(0.81 - 0.87)	0.000	0.89(0.87 -0.91)	0.000	0.89(0.88 - 0.91)
	Size of child at birth	Very large@
		Larger than average	0.079	0.96(0.87 - 1.07)	0.063	0.94(0.89 -1)	0.003	0.93(0.88 - 0.97)
		Average	0.761	0.99(0.91 - 1.08)	0.798	0.99(0.94 -1.05)	0.882	1(0.96 - 1.04)
		Smaller than average	0.000	1.25(1.12 - 1.4)	0.000	1.17(1.1 -1.25)	0.000	1.37(1.3 - 1.45)
		Very small	0.000	1.35(1.12 - 1.61)	0.000	1.36(1.24 -1.49)	0.000	1.7(1.58 - 1.84)
	Age of child (in months)	>=12@
		13–23	0.000	2.28(2.13 - 2.44)	0.000	0.85(0.82 -0.89)	0.000	1.35(1.3 - 1.41)
		24–35	0.000	1.99(1.86 - 2.13)	0.000	0.82(0.78 -0.85)	0.000	1.55(1.49 - 1.61)
		36–47	0.000	2.22(2.08 - 2.38)	0.000	0.68(0.65 -0.72)	0.000	1.59(1.52 - 1.65)
		48–59	0.000	1.9(1.77 - 2.04)	0.000	0.68(0.65 -0.72)	0.000	1.64(1.57 - 1.71)
	Religion	Hindu@
		Muslim	0.000	0.92(0.81 - 1.05)	0.000	1.17(1.12 -1.22)	0.000	1.1(1.06 - 1.14)
		Others	0.000	0.93(0.89 - 0.98)	0.000	0.68(0.65 -0.71)	0.000	0.63(0.61 - 0.66)
	Birth order	1@
		2	0.000	1.09(1.03 - 1.15)	0.000	1.06(1.03 -1.1)	0.000	1.19(1.16 - 1.22)
		3	0.000	1.18(1.11 - 1.26)	0.065	1.04(1 -1.08)	0.000	1.33(1.28 - 1.37)
		4 & above	0.000	1.36(1.27 - 1.47)	0.197	0.97(0.92 -1.02)	0.000	1.41(1.35 - 1.47)
	Body Mass Index	Underweight
		Normal	0.000	0.74(0.7 - 0.78)	0.000	0.77(0.75 -0.79)	0.000	0.65(0.63 - 0.67)
		Overweight/Obese	0.000	0.65(0.6 - 0.71)	0.000	0.55(0.52 -0.58)	0.000	0.45(0.44 - 0.47)
	Caste	Scheduled caste@		0.57(0.49 - 0.68)
		Scheduled tribe	0.000	0.91(0.88 - 0.94)	0.000	1.13(1.08 -1.17)	0.007	0.95(0.92 - 0.99)
		Other Backward Class	0.000	0.92(0.89 - 0.94)	0.735	1.01(0.97 -1.04)	0.000	0.95(0.92 - 0.98)
		None of above	0.000	0.76(0.73 - 0.78)	0.000	0.89(0.85 -0.93)	0.000	0.77(0.74 - 0.8)
	Note: @ Reference category. C.I.-Confidence Interval.
