# Supplementary material
Source: Research Square preprint supplement (doi:10.21203/rs.3.rs-8667960/v1)
Supplement: Supplementary file 2 [file fa62531cf72a8f2489414e11.docx]

**Supplementary Material**

**1. Logistic Regression**

The Logistic regression model is one of the many generalized linear models (GLM). It is a model for binary variables where the response records either success or failure for a given event. The logistic regression model is given by:

where pi is the probability of success and, P (y**i** = 1) = pi and P (y**i** = 0) = q**i** = 1− p**i**, 0≤ p**i** ≤1. Also, β**0** and β**1** are the model's parameters, xi is an independent variable, and exp is the mathematical constant called Euler's number which is approximately equal to 2.78.

Logistic regression can be extended to combine more than one independent variable, continuous or categorical variables. The multiple logistic regression model can be then written as:

where, = exp {zi} where is the odd ratio

defined as the probability of occurrence of the event divided by the likelihood of not occurrence the event. The odd ratio is a solution of the upper and lower limits for the probability where, 0 < odd ratio < ∞.

Therefore, logit is a linear function in independent variables xj,1≤j≤n .
